# Supplementary material
Source: Springer Nature journal article supplement (https://www.springermedizin.de/resource/supplementary/13000_2011_425_MOESM3_ESM.pdf/9624542)

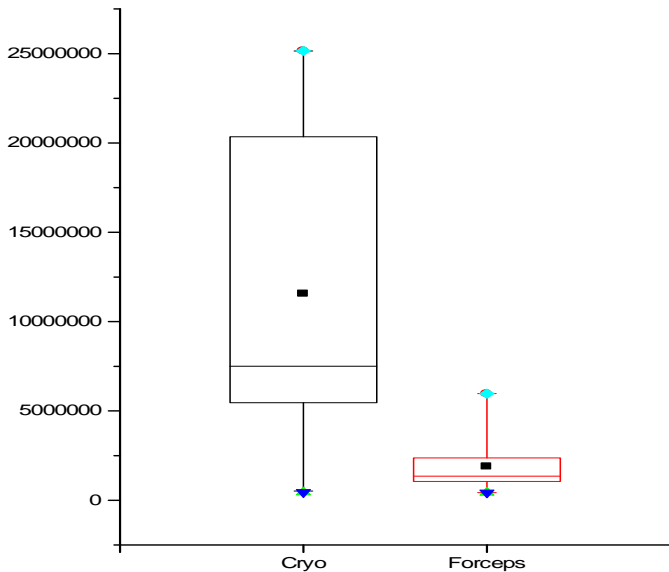

|         | Mean   | MAX    | Min   | P1    | p99    | sd    |
|---------|--------|--------|-------|-------|--------|-------|
| Cryo    | 11.562 | 25.155 | 0.449 | 0.449 | 25.155 | 9.071 |
| Forceps | 1.891  | 5.972  | 0.430 | 0.430 | 5.972  | 1.580 |

Supplement: MOESM3 [file 9624542]
